# Supplementary material for: Posttranslational modification of a histone-like protein regulates phenotypic resistance to isoniazid in mycobacteria
Source: PubMed Central journal article supplement — Sci Adv. 2018 May 2;4(5):eaao1478. doi: 10.1126/sciadv.aao1478 (PMC5931751; doi:10.1126/sciadv.aao1478), 2018-05-02
Supplement: aao1478_SM.pdf [file aao1478_SM.pdf]

## Supplementary Materials for

### **Posttranslational modification of a histone-like protein regulates phenotypic resistance to isoniazid in mycobacteria**

Alexandra Sakatos, Gregory H. Babunovic, Michael R. Chase, Alexander Dills, John Leszyk, Tracy Rosebrock, Bryan Bryson, Sarah M. Fortune

Published 2 May 2018, *Sci. Adv.* **4**, eaao1478 (2018)  
DOI: 10.1126/sciadv.aao1478

#### **This PDF file includes:**

- table S1. Bacterial strains used in this study.
- table S2. Genes down-regulated >10-fold in small versus large colonies.
- table S3. Genes up-regulated more than fivefold in HupB $\Delta$  versus WT.
- fig. S1. *M. tuberculosis* colony sizes and numbers plated on increasing concentrations of INH.
- fig. S2. *M. smegmatis* strains expressing WT and mutant HupB alleles grown at WT rates.
- fig. S3. Modifications identified in previous study and current work.
- fig. S4. His-tagged HupB was purified from *M. smegmatis*, and modifications were identified by MS.
- fig. S5. Effects of disrupting HupB modification sites on HupB protein abundance.

## Supplementary Materials

**table S1. Bacterial strains used in this study.**

| Strain or plasmid           | Relevant genotype and description                                                                                                                                                                 | Source     |
|-----------------------------|---------------------------------------------------------------------------------------------------------------------------------------------------------------------------------------------------|------------|
| mc <sup>2</sup> 155         | Wild type <i>M. smegmatis</i>                                                                                                                                                                     | Lab stock  |
| E.coli DH5 $\alpha$         | Host of plasmid used for cloning                                                                                                                                                                  | Lab stock  |
| WT_empty vector             | mc <sup>2</sup> 155 strain with with p <sub>jeb</sub> vector inserted at attB site                                                                                                                | This study |
| HupBA_empty vector          | hupB gene deletion mutant of mc <sup>2</sup> 155 with p <sub>jeb</sub> vector integrated at attB site                                                                                             | This study |
| HupBA_p <sub>jeb</sub> ::WT | <i>hupB</i> gene deletion mutant of mc <sup>2</sup> 155 complemented with WT <i>hupB</i> expressed under its native promoter (200 bp upstream of <i>hupB</i> gene) in the p <sub>jeb</sub> vector | This study |
| HupBA_p <sub>jeb</sub> ::WT | hupB gene deletion mutant of mc <sup>2</sup> 155 complemented with K86R mutant of <i>hupB</i> expressed under its native promoter                                                                 | This study |

**table S2. Genes down-regulated >10-fold in small versus large colonies.**

| Gene name  | Product                                            | Fold change | p-value   |
|------------|----------------------------------------------------|-------------|-----------|
| MSMEG_5568 | Clavaldehyde dehydrogenase                         | 35.41568388 | 6.72E-98  |
| MSMEG_6451 | ArsR, transcriptional regulator                    | 33.52727279 | 1.85E-148 |
| MSMEG_0538 | MarR                                               | 18.09940587 | 1.12E-163 |
| MSMEG_3362 | Enoyl-CoA hydratase                                | 18.07062619 | 8.26E-53  |
| MSMEG_0894 | dihydrodipicolinate reductase                      | 16.61854973 | 1.58E-46  |
| MSMEG_4334 | flavoprotein                                       | 16.24766249 | 6.00E-54  |
| MSMEG_4333 | TetR transcriptional regulator                     | 14.55094106 | 3.71E-26  |
| MSMEG_0285 | TetR transcriptional regulator                     | 13.80766428 | 1.20E-129 |
| MSMEG_1564 | lignostilbene-alpha,beta-dioxygenase               | 13.04035087 | 7.84E-14  |
| MSMEG_4057 | GntR transcriptional regulator                     | 12.31583883 | 4.78E-110 |
| MSMEG_4026 | hypothetical protein                               | 11.66841714 | 1.93E-93  |
| MSMEG_4034 | NAD dependent epimerase/dehydratase family protein | 11.39409212 | 3.17E-95  |
| MSMEG_3012 | acetyl-CoA acetyltransferases                      | 10.9587545  | 2.36E-40  |

|            |                                                  |             |          |
|------------|--------------------------------------------------|-------------|----------|
| MSMEG_5819 | pyridoxamine 5'-phosphate oxidase family protein | 10.64027145 | 1.29E-12 |
| MSMEG_3520 | TetR- transcriptional regulator                  | 10.24468663 | 1.73E-56 |
| MSMEG_2532 | dehydroquinase dehydratase, type II              | 10.02220734 | 1.46E-36 |
| MSMEG_3318 | oxidoreductase                                   | 10.00810306 | 1.09E-37 |
| MSMEG_6505 | NfnB protein                                     | 9.513810908 | 2.13E-47 |
| MSMEG_2011 | LacI transcriptional regulator                   | 9.239361958 | 1.54E-12 |
| MSMEG_5596 | oxidoreductase                                   | 9.237059746 | 1.31E-21 |

table S3. Genes up-regulated more than fivefold in HupBA versus WT.

| Gene name  | Product                                                              | Fold change | p-value     |
|------------|----------------------------------------------------------------------|-------------|-------------|
| MSMEG_2266 | hypothetical protein                                                 | 14.99065998 | 0.000897823 |
| MSMEG_4141 | hypothetical protein                                                 | 9.150673323 | 7.33E-10    |
| MSMEG_0643 | extracellular solute-binding protein, family protein 5, putative     | 7.368960396 | 0.000789029 |
| MSMEG_3325 | hypothetical protein                                                 | 6.296780421 | 0.033627484 |
| MSMEG_2274 | hydrogenase assembly chaperone HypC/HupF                             | 5.968932095 | 2.23E-06    |
| MSMEG_2659 | alanine dehydrogenase                                                | 5.64584855  | 0.002833064 |
| MSMEG_5083 | hypothetical protein                                                 | 5.642153607 | 0.000341015 |
| MSMEG_0641 | binding-protein-dependent transport systems inner membrane component | 5.481512254 | 2.61E-19    |
| MSMEG_5568 | Clavaldehyde dehydrogenase                                           | 5.358667289 | 0.005390566 |
| MSMEG_3199 | quinolinate synthetase complex, A subunit                            | 5.265245111 | 0.068910413 |

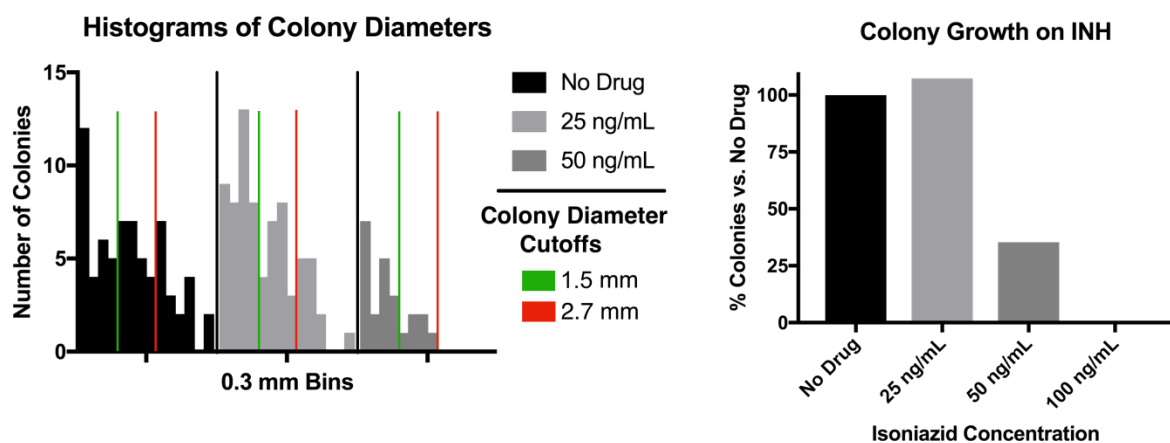

fig. S1. *M. tuberculosis* colony sizes and numbers plated on increasing concentrations of INH.

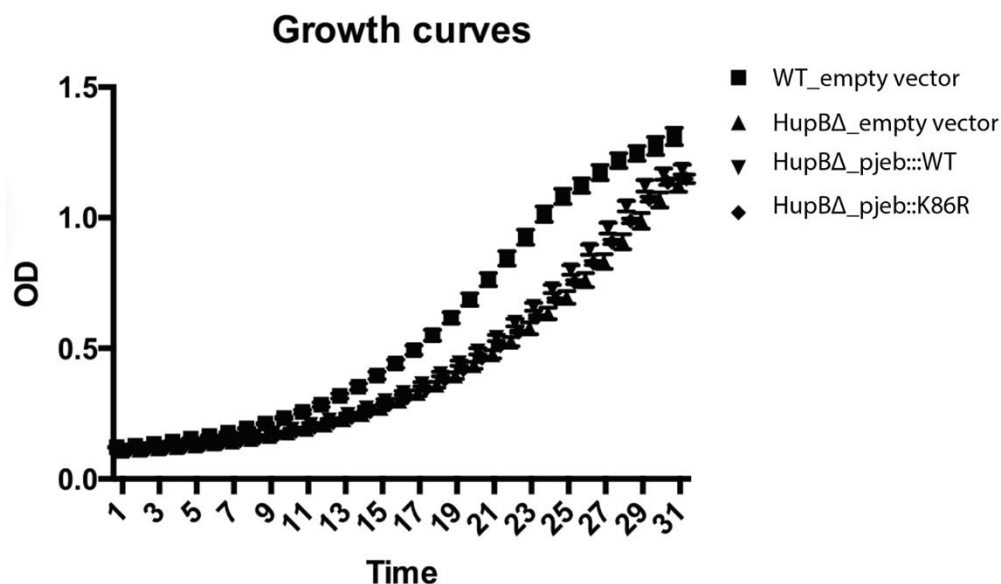

**fig. S2. *M. smegmatis* strains expressing WT and mutant HupB alleles grown at WT rates.** Indicated strains were grown in triplicate in 7H9 medium. There were no significant differences in growth rates between the *hupB* deletion mutant complemented with the WT and K86R alleles.

| Residue          | Published modification on <i>M.tuberculosis</i> HupB <sup>9</sup> | Modification identified in this study on <i>M.smegmatis</i> HupB |
|------------------|-------------------------------------------------------------------|------------------------------------------------------------------|
| K3               | acetylation                                                       | acetylation, methylation                                         |
| R53, R54, or R55 | none                                                              | methylation                                                      |
| K72              | acetylation                                                       | acetylation                                                      |
| K86              | acetylation                                                       | methylation                                                      |
| K94              | none                                                              | acetylation, methylation                                         |
| K103             | Acetylation                                                       | acetylation, methylation                                         |

**fig. S3. Modifications identified in previous study and current work.**

| Peptide Sequence   | Mascot Ion score | Mascot Identity score | Modifications identified by spectrum |
|--------------------|------------------|-----------------------|--------------------------------------|
| MNKAELIDVLTTK      | 46.9             | 28.6                  | Methyl(+14)                          |
| VKPTSVPAFRPGAQFK   | 40               | 31.2                  | Methyl(+14)                          |
| AVISGAQKLPADGPAVKR | 26.7             | 28.8                  | Methyl(+14)                          |
| AVISGAQKLPADGPAVK  | 87.4             | 29.7                  | Acetyl(+42)                          |
| LPADGPAVKR         | 67.7             | 25                    | Acetyl(+42)                          |
| MNKAELIDVLTTK      | 26.9             | 28.7                  | Oxidation(+16), Acetyl(+42)          |

**fig. S4. His-tagged HupB was purified from *M. smegmatis*, and modifications were identified by MS.** Representative peptides are shown. Mascot Ion score is the calculated probability that the observed match between the experimental data and database sequence is a random event, reported in  $-10\log(P)$ .

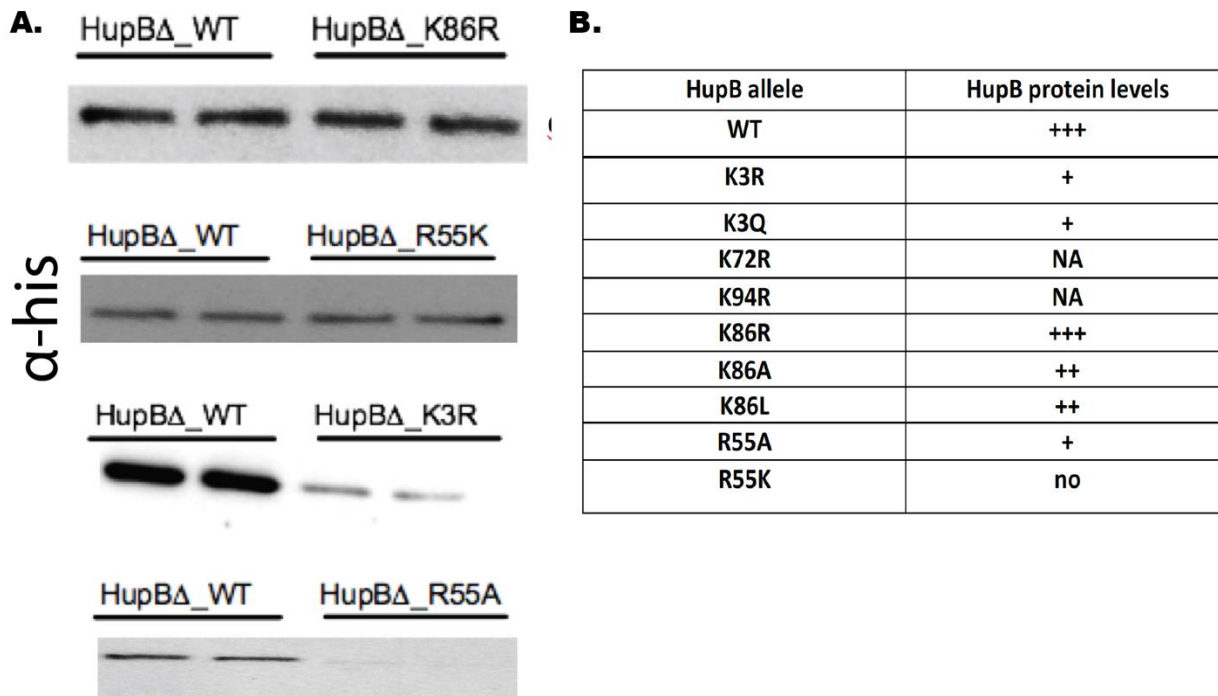

**fig. S5. Effects of disrupting HupB modification sites on HupB protein abundance. A)** Protein levels of representative HupB point mutants tagged by western blot. **B)** Summary of all mutants assessed on HupB protein levels relative to wild-type as measured by western blot.
